# Supplementary material for: Association of Inadvertent 9-Valent Human Papillomavirus Vaccine in Pregnancy With Spontaneous Abortion and Adverse Birth Outcomes
Source: PubMed Central journal article supplement (PMC8022219; doi:10.1001/jamanetworkopen.2021.4340), 2021-04-05
Supplement: jamanetwopen-e214340-s001.pdf [file jamanetwopen-e214340-s001.pdf]

## Supplementary Online Content

Kharbanda EO, Vazquez-Benitez G, DeSilva MB, et al. Association of inadvertent 9-valent human papillomavirus vaccine in pregnancy with spontaneous abortion and adverse birth outcomes. *JAMA Netw Open*. 2021;4(4):e214340.  
doi:10.1001/jamanetworkopen.2021.4340

**eFigure 1.** Histograms of Propensity Scores for Full Cohort

**eFigure 2.** Standardized Differences Before and After IPW for Selected Risk Factors, Full Cohort

**eTable.** List of Teratogenic and Abortifacient Medication Exclusions if Prescription Fill During Pregnancy or Within 8 Months of Last Menstrual Period

This supplementary material has been provided by the authors to give readers additional information about their work.

**eFigure 1.** Histograms of Propensity Scores for Full Cohort

a) During pregnancy vs Distal

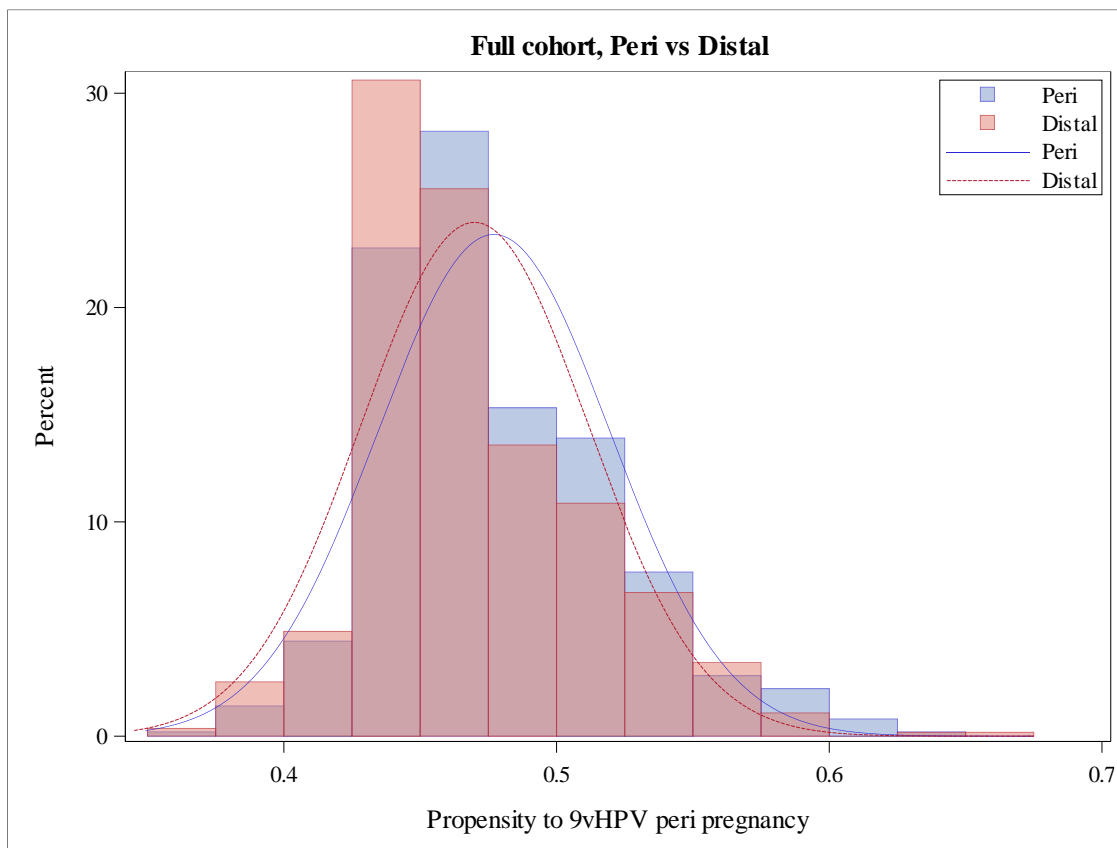

b) Peri-pregnancy vs Distal

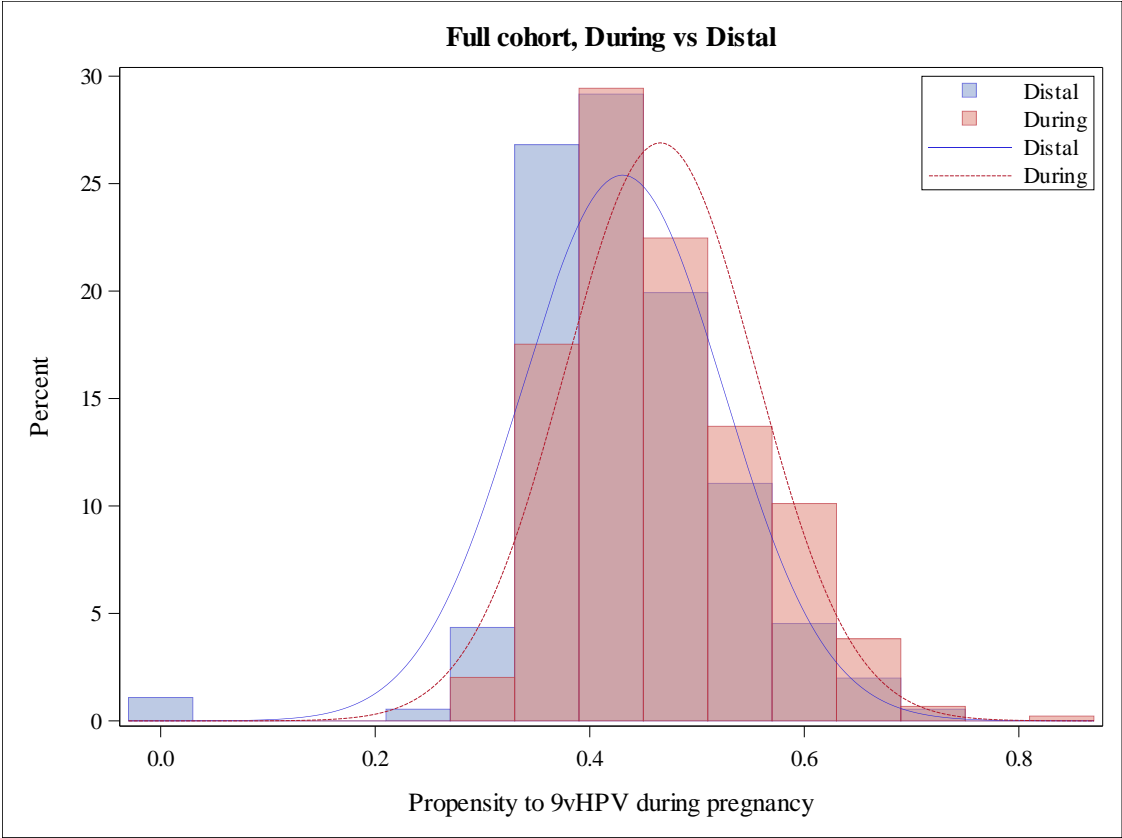

c) Peri-pregnancy or During pregnancy vs Distal, for live birth cohort

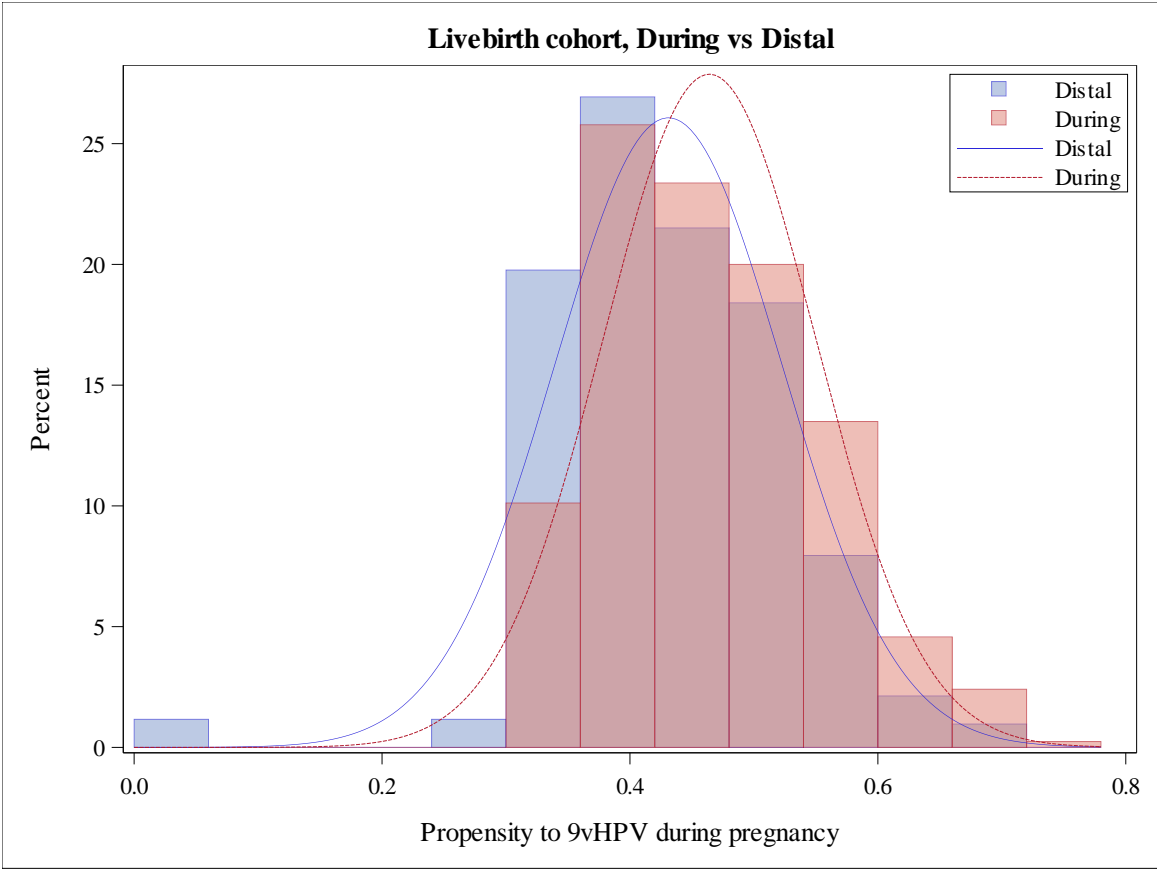

d) During pregnancy vs Distal

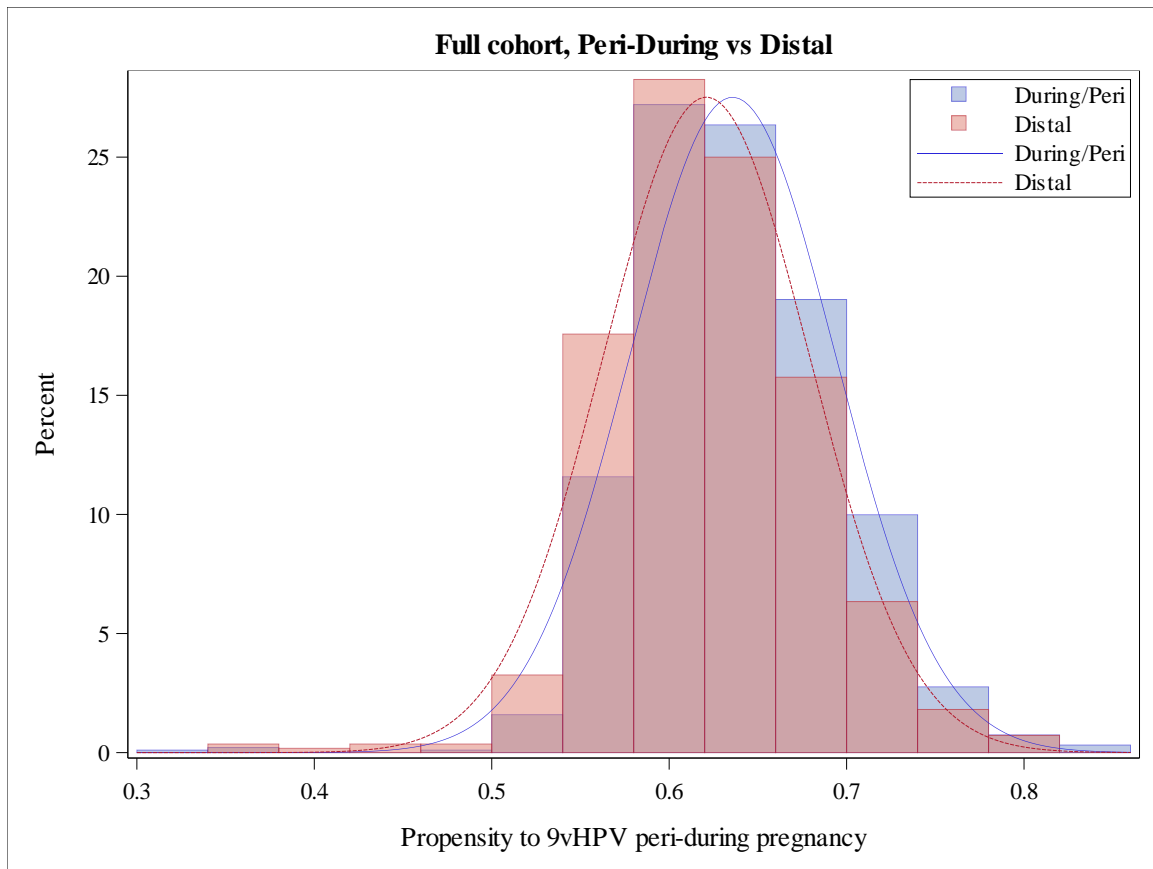

e) Peri-pregnancy vs Distal

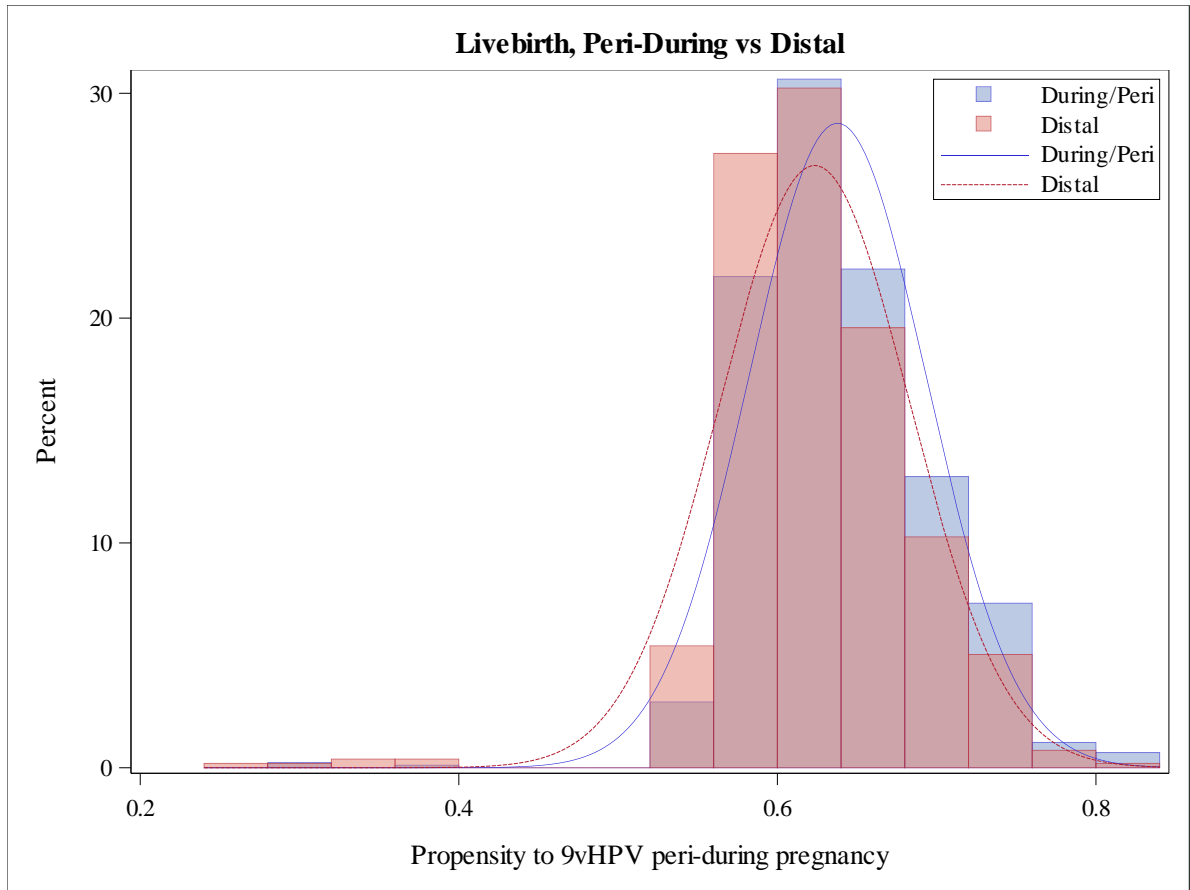

f) Peri-pregnancy or During pregnancy vs Distal

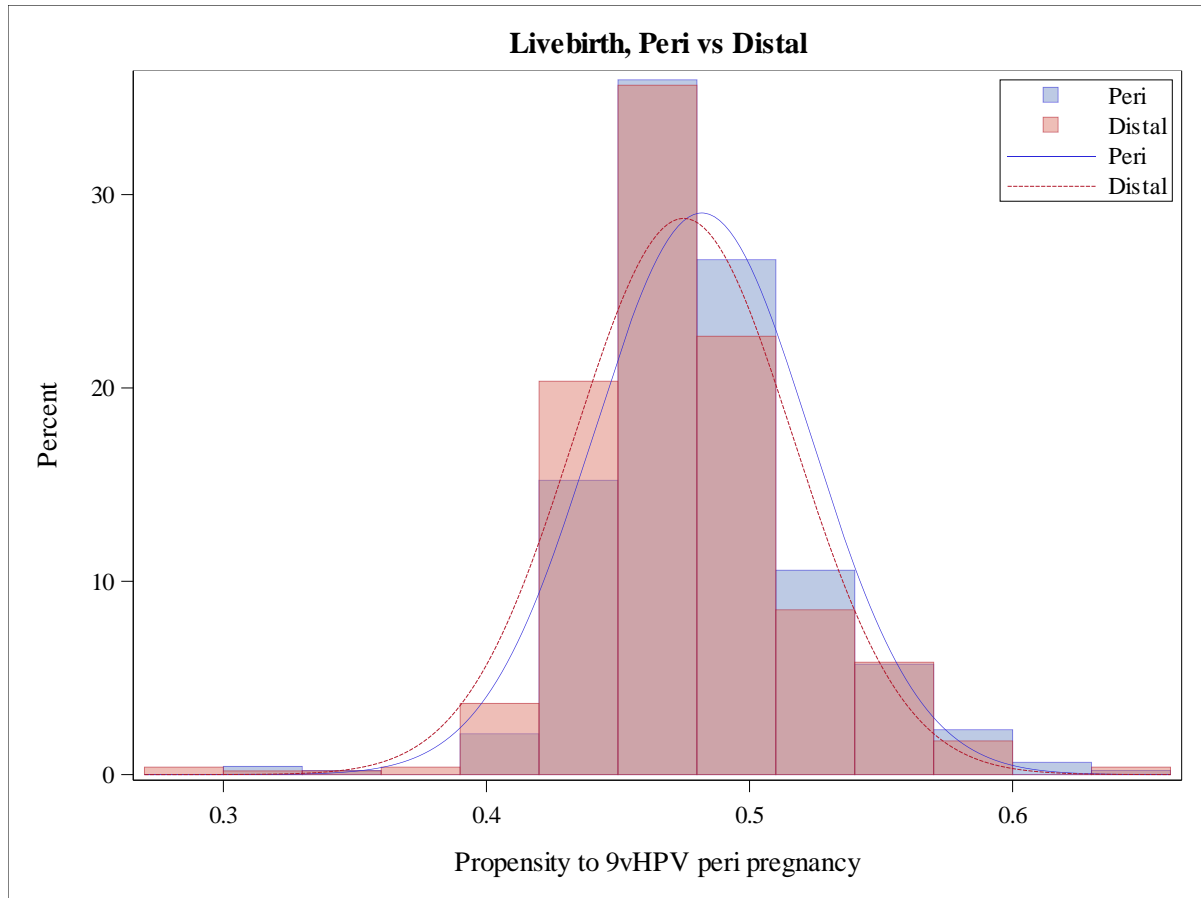

**eFigure 2.** Standardized Differences Before and After IPW for Selected Risk Factors, Full Cohort

(a) During pregnancy vs Distal

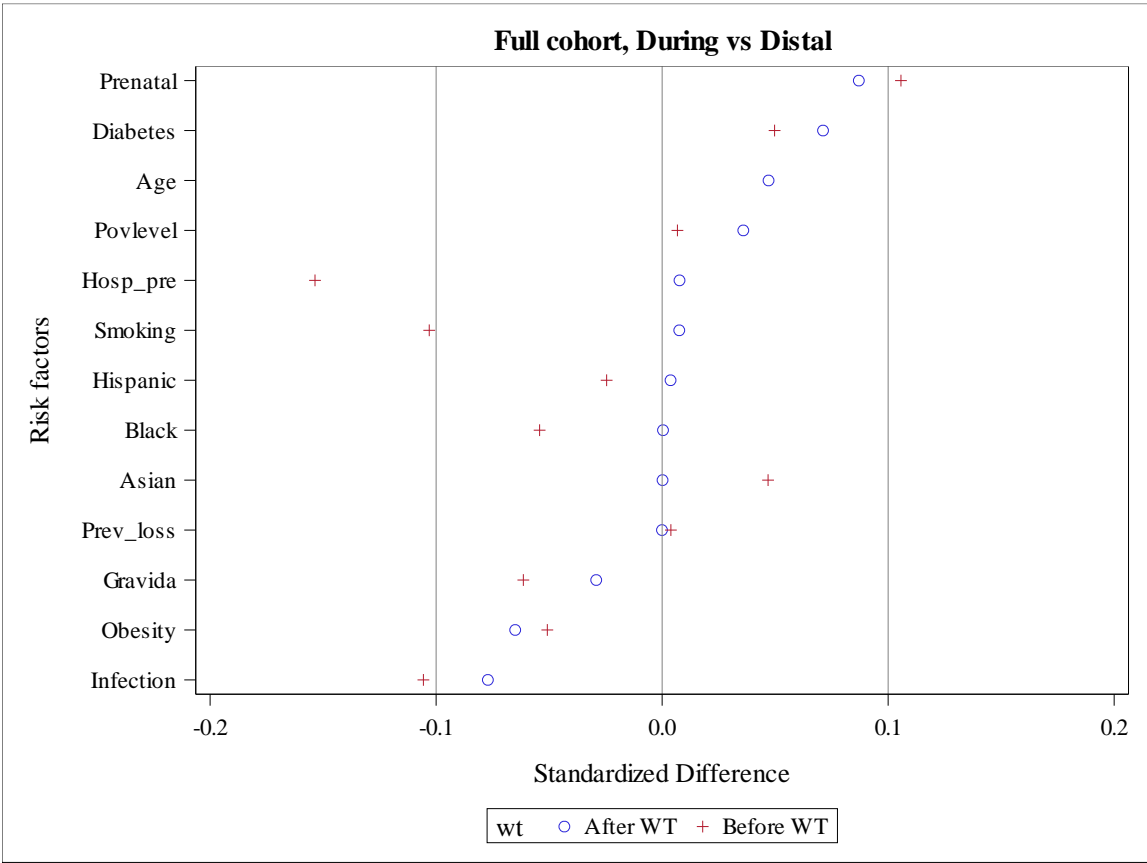



b) Peri-pregnancy vs Distal

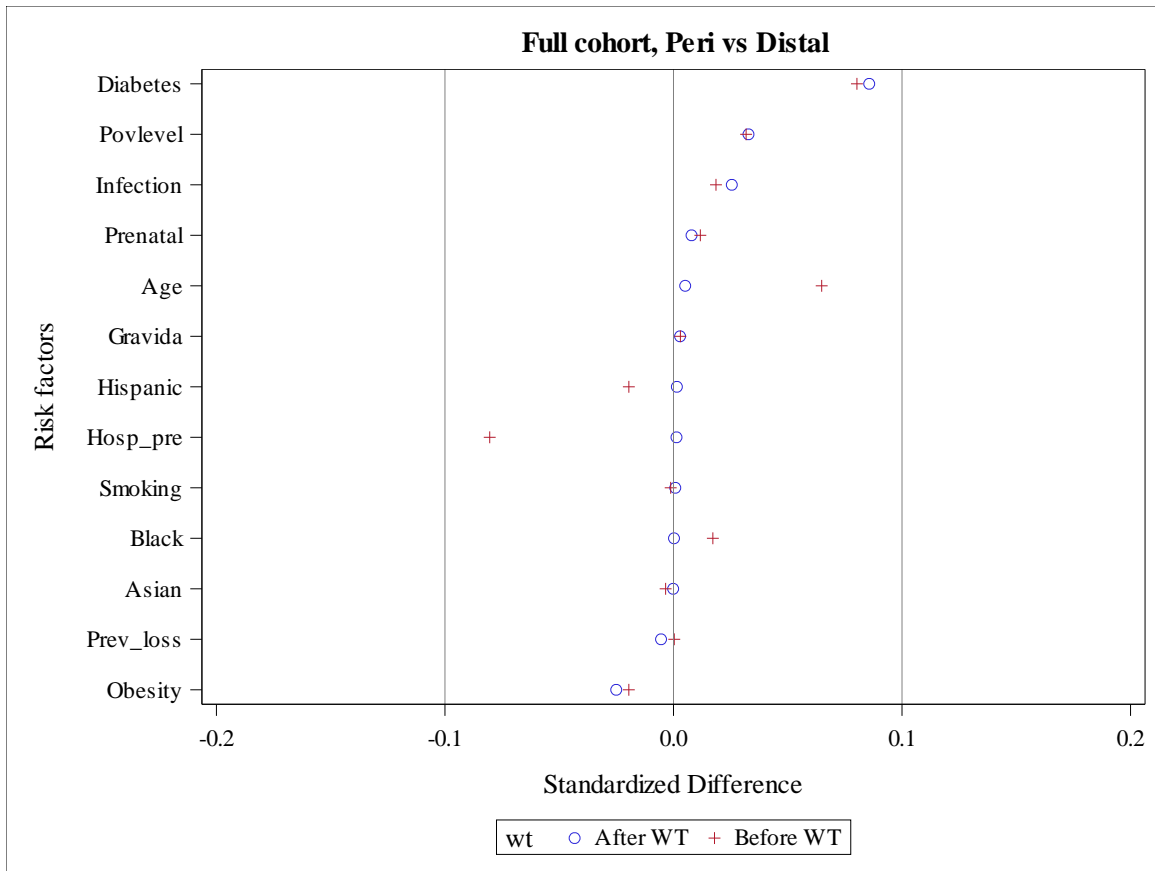

c) Peri-pregnancy or During pregnancy vs Distal, for live birth cohort

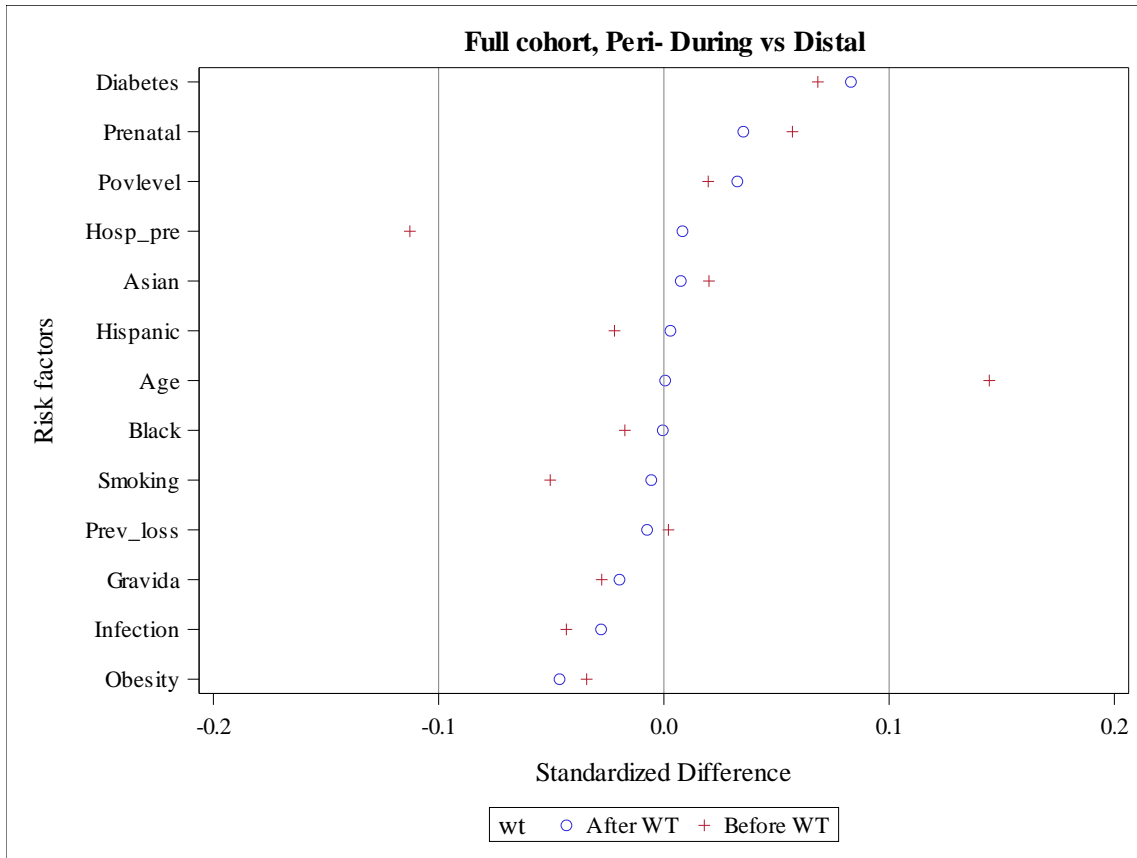

d) During pregnancy vs Distal

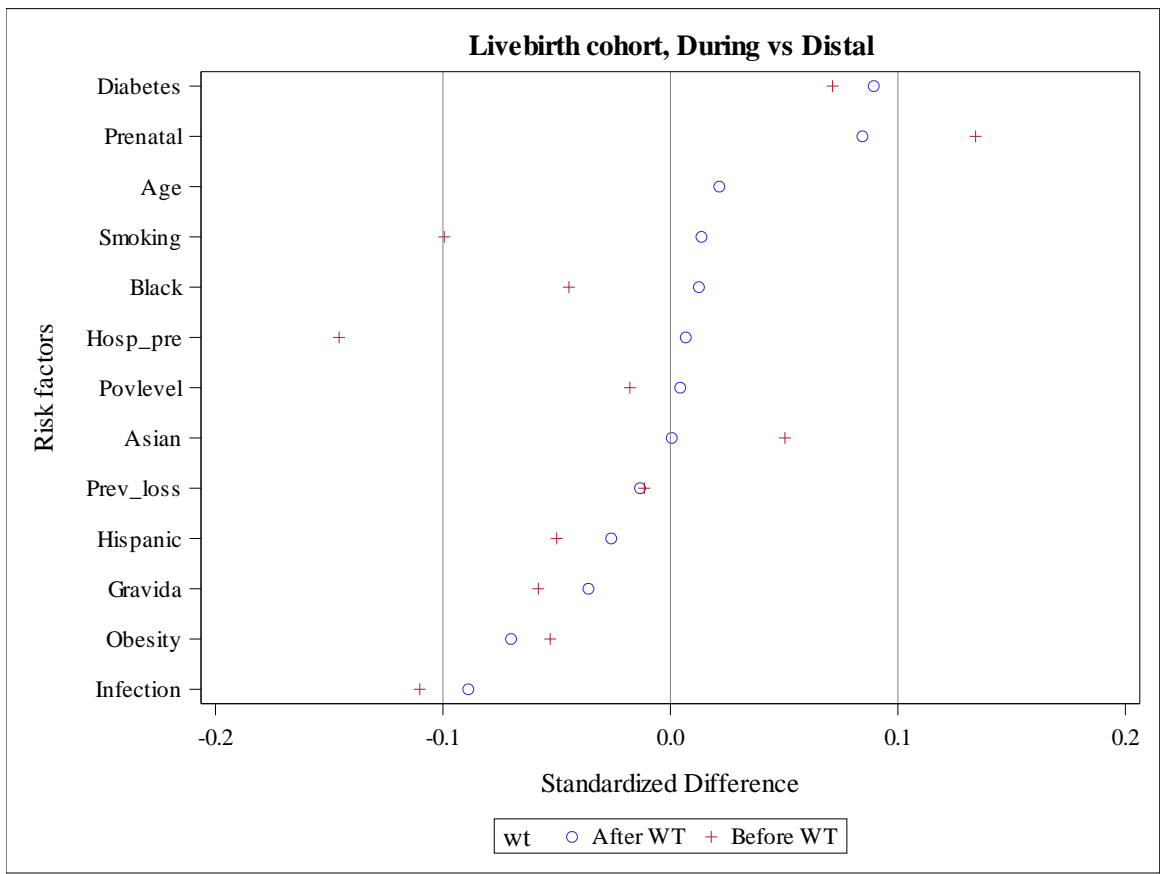

e) Peri-pregnancy vs Distal

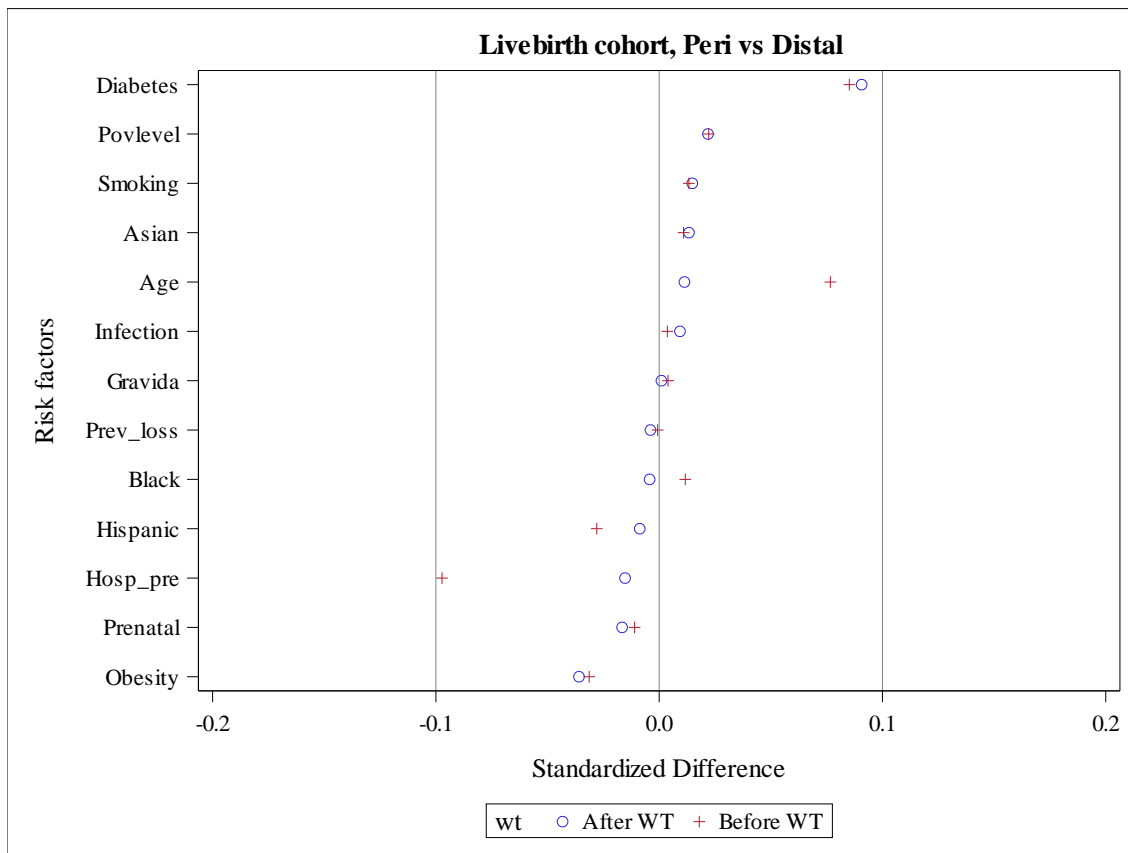

f) Peri-pregnancy or During pregnancy vs Distal

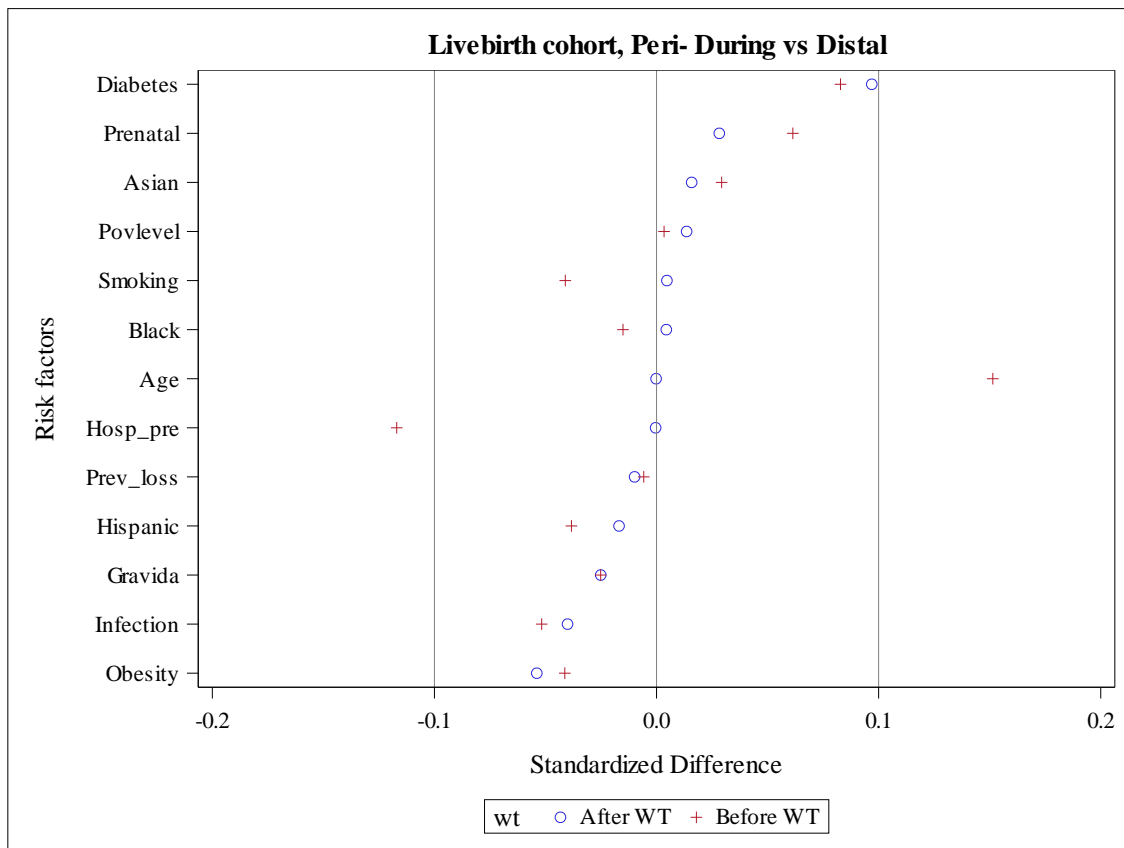

**eTable.** List of Teratogenic and Abortifacient Medication Exclusions if Prescription Fill During Pregnancy or Within 8 Months of Last Menstrual Period

| <b>Drug Class</b>    | <b>Drug Name</b>              | <b>Drug Classification</b> |
|----------------------|-------------------------------|----------------------------|
| Prostaglandin Analog | Mifepristone                  | Abortifacient              |
| Prostaglandin Analog | Carboprost                    | Abortifacient              |
| Prostaglandin Analog | Sulprostone                   | Abortifacient              |
| Prostaglandin Analog | Gemeprost                     | Abortifacient              |
| Prostaglandin Analog | Misoprostol                   | Abortifacient              |
| Antineoplastic       | Methotrexate                  | Abortifacient              |
| Vitamin A Analog     | Isotretinoin                  | Teratogenic                |
| Vitamin A Analog     | Bexarotene                    | Teratogenic                |
| Vitamin A analog     | Acitretin                     | Teratogenic                |
| Immuosuppressant     | Mycophenolate Mofetil         | Teratogenic                |
| Immunologic          | Azathioprine                  | Teratogenic                |
| Immunologic          | Thalidomide                   | Teratogenic                |
| Anticoagulant        | Warfarin                      | Teratogenic                |
| Mood Stabilizer      | Lithium                       | Teratogenic                |
| Antiarrhythmic       | Amiodarone                    | Teratogenic                |
|                      |                               |                            |
| Antiarrhythmic       | Dronedarone                   | Teratogenic                |
| Anticonvulsant       | Carbamazepine                 | Teratogenic                |
| Anticonvulsant       | Fosphenytoin                  | Teratogenic                |
| Anticonvulsant       | Mephobarbital                 | Teratogenic                |
| Anticonvulsant       | Phenobarbital                 | Teratogenic                |
| Anticonvulsant       | Phenytoin                     | Teratogenic                |
| Anticonvulsant       | Primidone                     | Teratogenic                |
| Anticonvulsant       | Topiramate                    | Teratogenic                |
| Anticonvulsant       | Valproic Acid and derivatives | Teratogenic                |
